# Supplementary material for: Preparation of siRNA–PLGA/Fabʹ–PLGA mixed micellar system with target cell-specific recognition
Source: PubMed Central journal article supplement (PMC8373956; doi:10.1038/s41598-021-96245-3), 2021-08-18
Supplement: 41598_2021_96245_MOESM1_ESM.pdf [file 41598_2021_96245_MOESM1_ESM.pdf]

## **Supplementary Information**

### **Preparation of siRNA–PLGA/Fab'–PLGA mixed micellar system with target cell-specific recognition**

Mai Hazekawa<sup>1\*</sup>, Takuya Nishinakagawa<sup>1</sup>, Takeshi Mori<sup>2</sup>, Miyako Yoshida<sup>2</sup>, Takahiro Uchida<sup>2</sup>  
and Daisuke Ishibashi<sup>1</sup>

<sup>1</sup>Department of Immunological and Molecular Pharmacology, Faculty of Pharmaceutical Sciences, Fukuoka University, Fukuoka, Japan

<sup>2</sup>Department of Clinical Pharmaceutics, Faculty of Pharmaceutical Sciences, Mukogawa Women's University, Hyogo, Japan

## Supplementary Figure S1

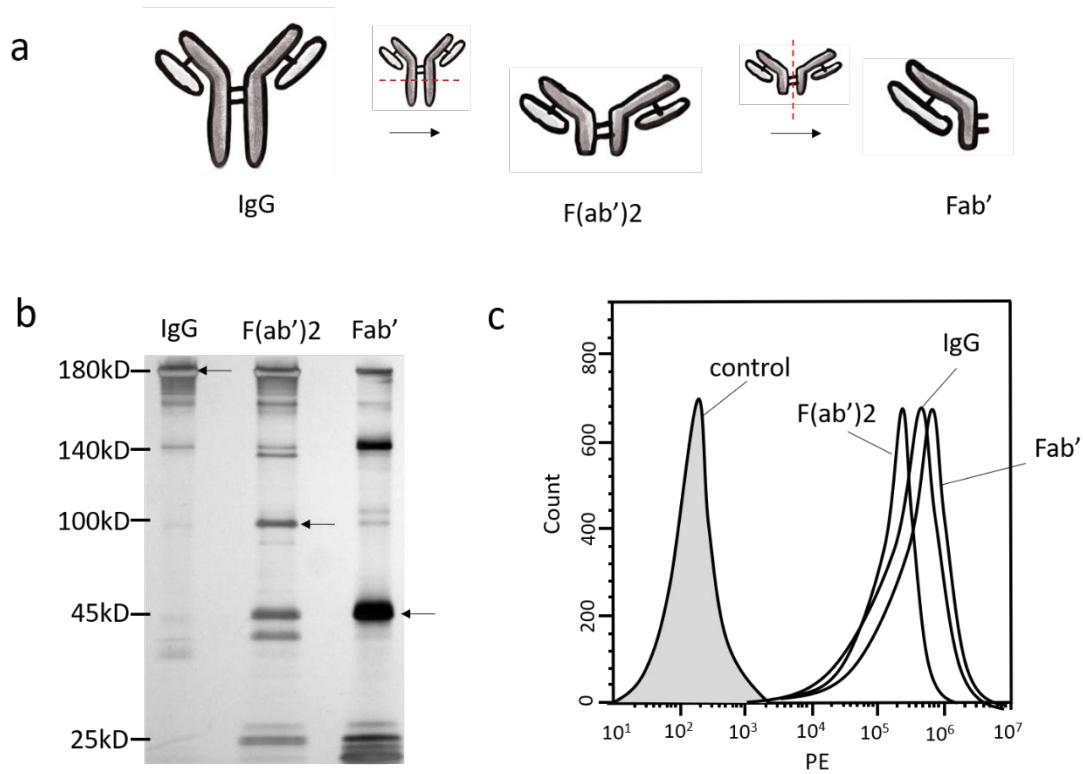

### **F(ab')<sub>2</sub> and Fab' structure obtained by fragmentation of IgG and existence confirmation and their activity evaluation for the antigen**

(a) Shape of the fragmentation of IgG; (b) Detection of IgG fragmentation using SDS-PAGE; (c) Evaluation of the binding activity of antibody fragments used in this study using a flow cytometer.

**Supplementary Figure S2**

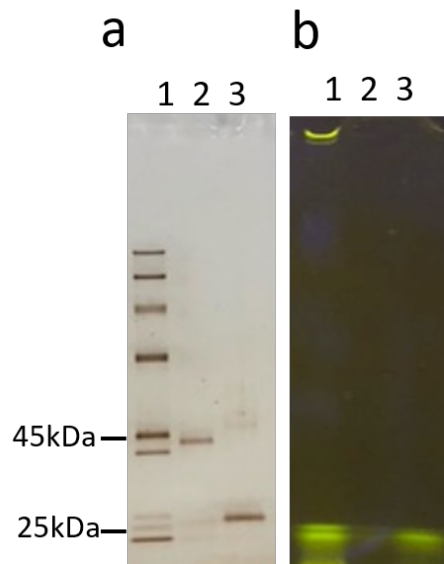

**Characterization of siRNA-PLGA and Fab'-PLGA conjugate via covalent bond** (a) Fab' visualized by Ag staining in the gel after SDS-PAGE. Lane1: F(ab')<sub>2</sub> and PLGA(FITC) mixture, Lane2: Fab'-PLGA(FITC), Lane3: Fab'-PLGA(FITC) treated with DTT (b) FITC visualized by transilluminator in the gel after SDS-PAGE. Lane1: F(ab')<sub>2</sub> and PLGA(FITC) mixture, Lane2: Fab'-PLGA(FITC), Lane3: Fab'-PLGA(FITC) treated with DTT.

### Supplementary Figure S3

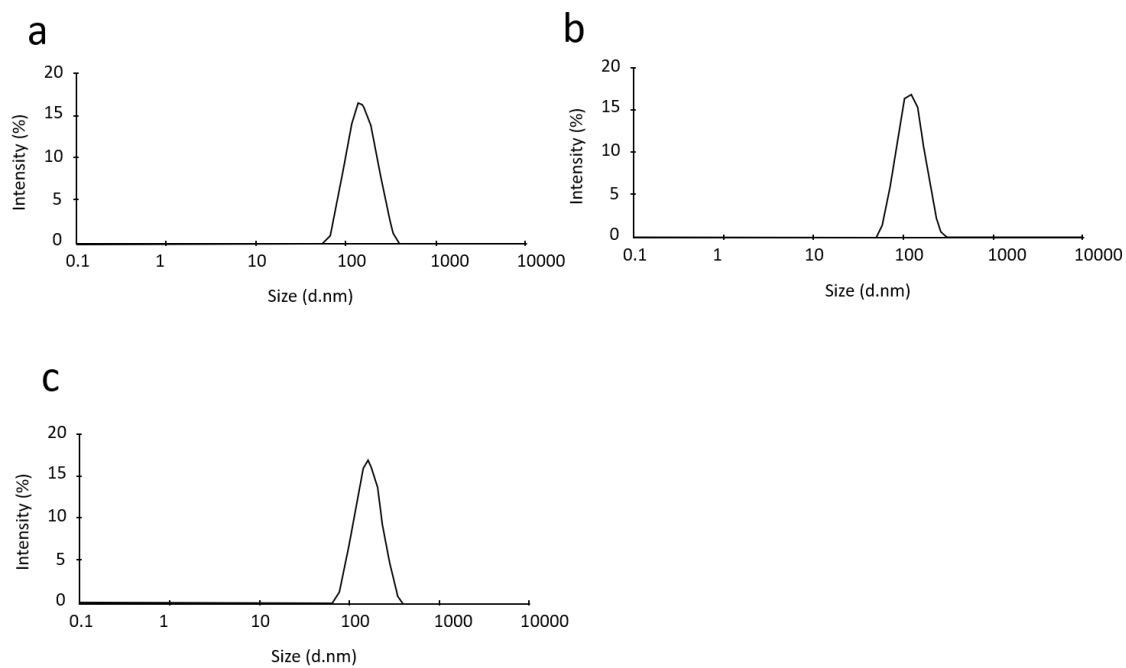

**The size distribution of each conjugate micelles.** (a) siRNA-PLGA conjugate micelles (b) siRNA-PLGA/ Fab'-PLGA mixed micelles (c) Fab'-PLGA conjugate micelles.

Supplementary Figure S4

S1b

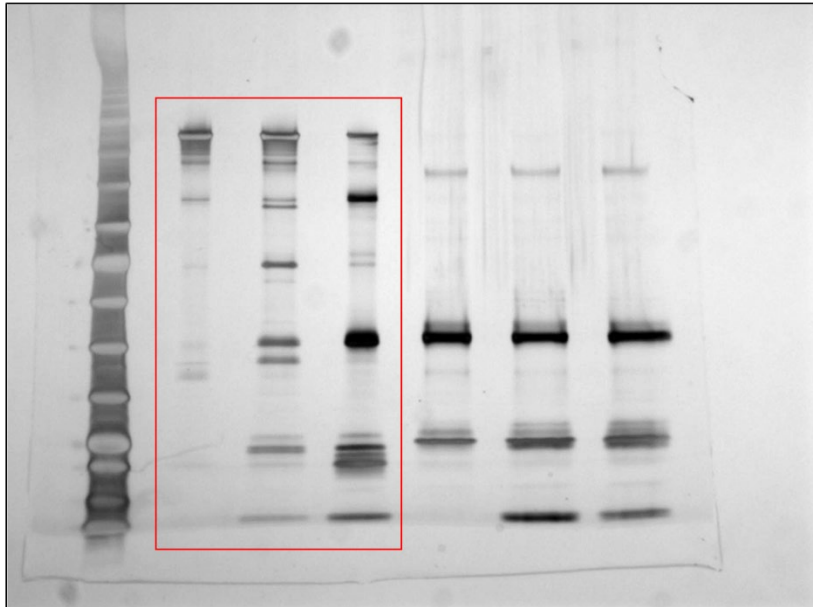

S2a, Ag stain of SDS-PAGE

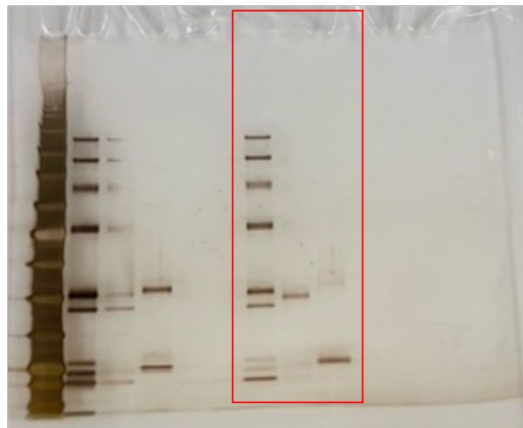

S2b, Fluorescence visualized by transilluminator of SDS-PAGE

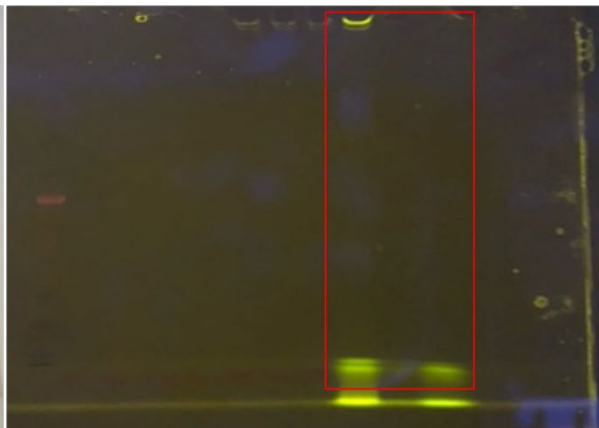

Original uncropped images of immunoblotting of main figures.

Supplementary Figure S4 (continued)

Fig. 2a

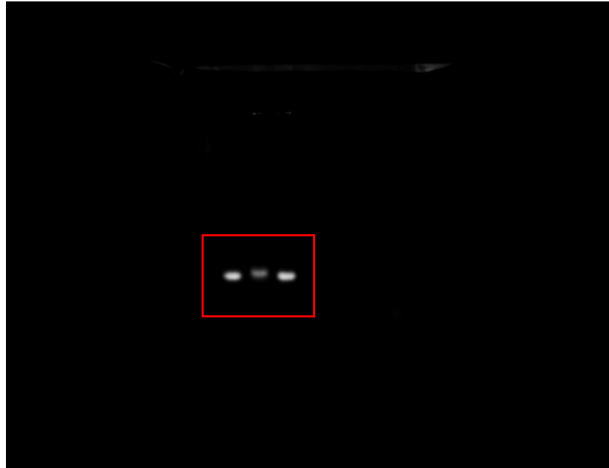

Fig. 2b

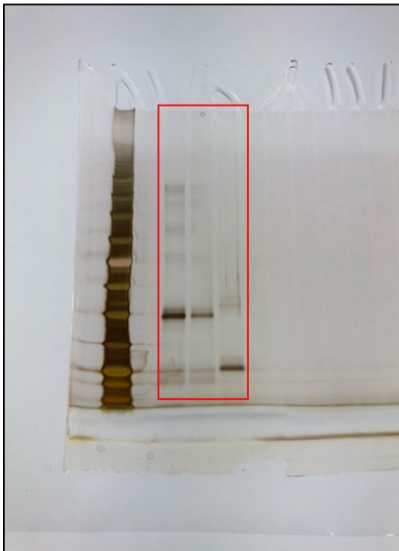

Fig. 2c

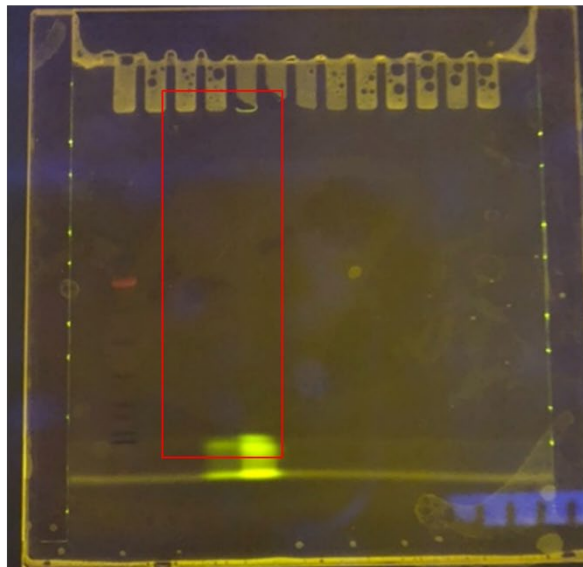

Original uncropped images of immunoblotting of main figures.

Supplementary Figure S4 (continued)

Fig. 4a, CyclinB1

Exposure time 60 sec

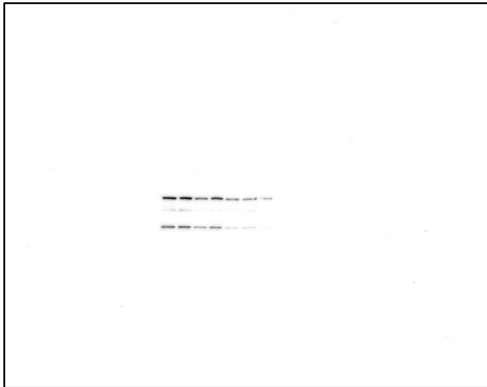

Exposure time 120 sec

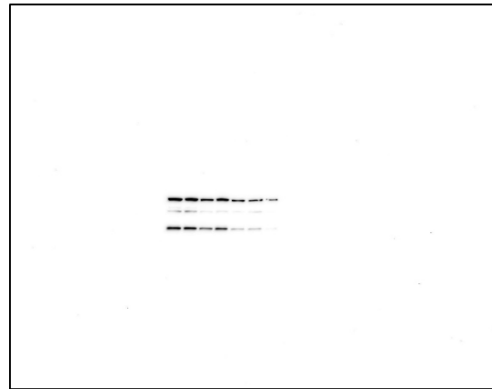

Exposure time 180 sec

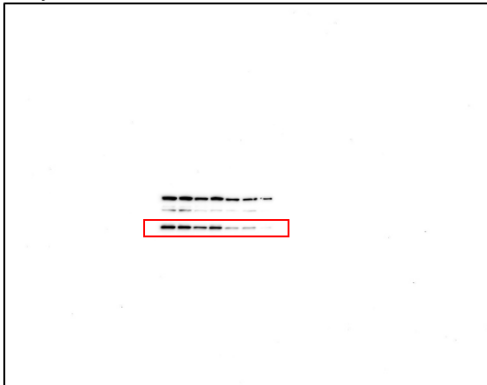

Original uncropped images of immunoblotting of main figures.

Supplementary Figure S4 (continued)

Fig. 4b, GAPDH

Exposure time 10 sec

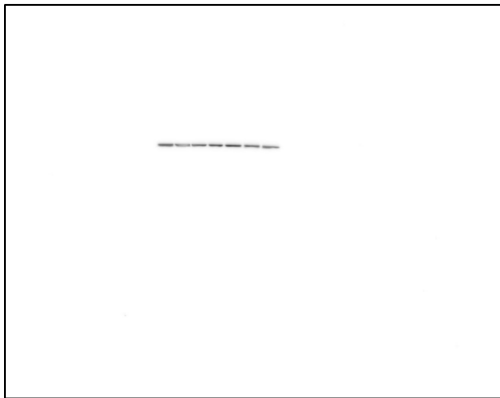

Exposure time 20 sec

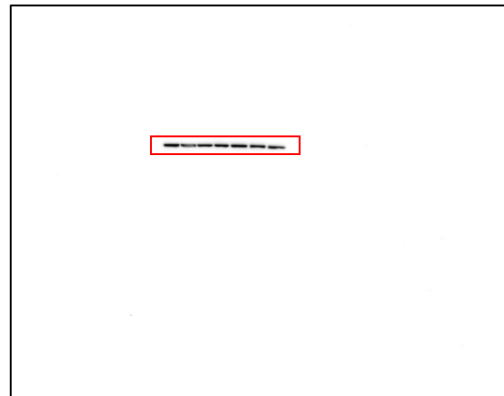

Exposure time 30 sec

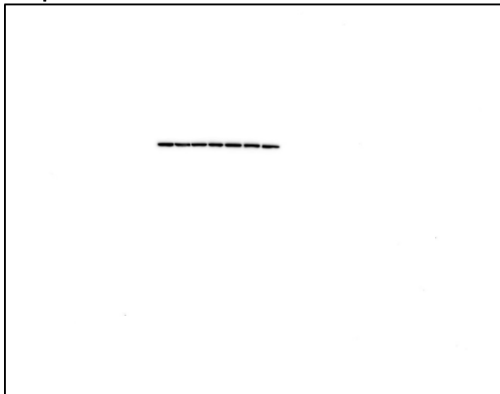

Original uncropped images of immunoblotting of main figures.
